# Supplementary material
Source: publisher figshare collection journal article supplement (https://gsapubs.figshare.com/ndownloader/files/22410510)
Supplement: Supplementary file 1 [file 22410510]

## Sheet: ISS and ISKK elemental comp.
REFERENCE1	LOCATION	SAMPLE NAME	MATERIAL	SPOT NAME	ANALYSIS DATE			STANDARDS6	All values reported in parts per million (ppm)
						Mount	Date		Li	Be	B	F	Na	Al	P	K	Ca	Sc	Ti	Fe	Y	Nb	La	Ce	Nd	Sm	Eu	Gd	Tb	Dy	Ho	Er	Tm	Yb	Lu	Hf	Th	U
Carley et al. 2014.	Krossá-Kækjudalsá	ISKK.	Zircon	ISKK_1.1	Jan.2013.	TLC2.	Jan.2013.	MAD Zircon	0	0.03	0.02	16.32	1.07	3.69	193.58	0.32	1.26	18.42	6.9	0.51	1912.9	7.59	0.02	11.51	2.2	5.76	1.64	56.78	18.64	214.24	80.37	331.14	63.55	492.07	81.03	10703.5	54.73	114.94
Carley et al. 2014.	Krossá-Kækjudalsá	ISKK.	Zircon	ISKK_10.1	Jan.2013.	TLC2.	Jan.2013.	MAD Zircon	0.01	11.53	0.19	9.45	1.36	2.94	132.62	1.52	4.25	8.23	10.57	6.13	1610.26	42.74	1.22	24.38	1.99	4.82	1.68	43.07	16.39	178.21	74.29	315.64	63	500.08	90.95	11285.3	46.09	135.17
Carley et al. 2014.	Krossá-Kækjudalsá	ISKK.	Zircon	ISKK_12.1	Jan.2013.	TLC2.	Jan.2013.	MAD Zircon	0	0.03	0.03	13.47	2.01	4.49	239.53	0.42	1.94	5.3	5.98	0.4	1685.31	40.74	0.01	29.61	1.55	4.65	1.47	46.17	17	188.9	75.3	309.31	60.7	452.01	74.43	10882.3	92.36	175.82
Carley et al. 2014.	Krossá-Kækjudalsá	ISKK.	Zircon	ISKK_13.1	Jan.2013.	TLC2.	Jan.2013.	MAD Zircon	0.07	144.82	0.32	22.9	1.79	5.56	686.22	0.38	2.25	30.1	4.78	64.56	3513.88	97.39	0.02	51.74	1.96	7.37	1.59	85.09	33.78	391.93	155.88	642.96	126.75	952.58	158.02	12793.6	255.54	500.4
Carley et al. 2014.	Krossá-Kækjudalsá	ISKK.	Zircon	ISKK_14.1	Jan.2013.	TLC2.	Jan.2013.	MAD Zircon	0.02	2.16	0.07	157.48	8.98	22.57	801.88	29.34	625.42	38.77	10.13	94.88	7510.53	74.13	61.4	214.98	63.59	40.31	5.49	230.96	67.22	700.61	285.16	1026.09	192.27	1415.17	228.5	11028.2	361.25	441.63
Carley et al. 2014.	Krossá-Kækjudalsá	ISKK.	Zircon	ISKK_15.1	Jan.2013.	TLC2.	Jan.2013.	MAD Zircon	0.01	2.59	0.08	9.2	3.24	5.75	254.88	0.58	2.61	20.21	6.86	0.36	1281.73	19.91	0.01	17.26	1.13	3.41	0.83	32.23	11.88	138.07	55.44	239.04	48.26	379.26	64	10542.5	61.24	141.56
Carley et al. 2014.	Krossá-Kækjudalsá	ISKK.	Zircon	ISKK_16.1	Jan.2013.	TLC2.	Jan.2013.	MAD Zircon	0	2.76	0.12	11.45	1.88	5.01	369.63	0.35	1.92	21.95	17.06	141.34	1198.48	11.79	0.03	12.58	1.59	3.98	1.31	35.35	12.1	128.6	51.03	209.4	41.51	317.06	54.88	9182.94	54.68	93.03
Carley et al. 2014.	Krossá-Kækjudalsá	ISKK.	Zircon	ISKK_17.1	Jan.2013.	TLC2.	Jan.2013.	MAD Zircon	0.06	45.01	0.37	62.65	5.53	58.1	253.81	5.9	13.59	26.64	9.55	22.82	1697.61	20.01	0.44	18.29	2.36	5.26	1.58	47.83	16.5	189.95	76.29	310.54	61.76	482.93	78.93	10612.9	104.05	126.58
Carley et al. 2014.	Krossá-Kækjudalsá	ISKK.	Zircon	ISKK_18.1	Jan.2013.	TLC2.	Jan.2013.	MAD Zircon	0.01	1.03	0.06	34.08	2.64	6.33	521.79	0.59	2.54	25.17	11.96	3.73	8379.55	48.33	0.23	61.22	19.72	42.33	13.75	341.03	102.49	1054.91	361.23	1391.17	260.54	1896.26	301	8769.84	266.7	354.43
Carley et al. 2014.	Krossá-Kækjudalsá	ISKK.	Zircon	ISKK_19.1	Jan.2013.	TLC2.	Jan.2013.	MAD Zircon	0	0.03	0.05	11.23	1.81	5.46	145.61	0.39	2.19	19.04	12.18	0.33	682.7	5.65	0.01	5.49	0.62	1.77	0.65	17.72	6.35	73.08	29.34	126.62	25.71	203.43	36.72	9681.65	12.89	34.4
Carley et al. 2014.	Krossá-Kækjudalsá	ISKK.	Zircon	ISKK_20.1	Jan.2013.	TLC2.	Jan.2013.	MAD Zircon	0.08	0.5	0.03	24.46	1.82	5.72	795.53	0.39	2.94	20.06	24.57	1.16	8848.79	263.5	0.11	229.89	15.55	46.94	16.4	422.16	124.9	1215.19	411.23	1518.78	271.89	1940.47	294.73	8905.93	1836.39	1199.03
Carley et al. 2014.	Krossá-Kækjudalsá	ISKK.	Zircon	ISKK_21.1	Jan.2013.	TLC2.	Jan.2013.	MAD Zircon	0	8.09	0.07	11.75	2.87	7.2	244.99	0.58	3.29	26.06	8.44	0.47	1366.38	19.28	0.01	14.64	1.33	3.86	1	36.81	12.53	146.98	57.19	243.77	50.21	393.38	67.01	10629.5	57.93	126.36
Carley et al. 2014.	Krossá-Kækjudalsá	ISKK.	Zircon	ISKK_22.1	Jan.2013.	TLC2.	Jan.2013.	MAD Zircon	0	27.41	0.15	8.92	2.81	6.8	174.48	0.6	2.83	5.49	6.66	0.44	1260.24	21.89	0.01	17.41	1.4	3.54	1.26	33.46	12.85	145.54	55.92	238.07	46.94	363.92	61.96	10578.9	35.24	89.62
Carley et al. 2014.	Krossá-Kækjudalsá	ISKK.	Zircon	ISKK_24.1	Jan.2013.	TLC2.	Jan.2013.	MAD Zircon	0.01	135.36	0.09	11.8	2.62	10.92	548.41	0.52	2.75	81.99	21.71	1.23	4135.38	62.91	0.06	50.8	5.07	14	3.89	140.16	47.06	489.81	179.17	712.29	133.43	988.12	166.52	8914.01	697.3	549.84
Carley et al. 2014.	Krossá-Kækjudalsá	ISKK.	Zircon	ISKK_25.1	Jan.2013.	TLC2.	Jan.2013.	MAD Zircon	0	8.95	0.03	7.19	2.73	6.87	254.35	0.53	3.06	19.29	7.43	0.4	1080.47	17.67	0.03	13.38	0.9	2.46	0.69	25.25	9.58	111.23	43.21	197.4	40.88	325.71	55.64	10762.7	54.37	129.86
Carley et al. 2014.	Krossá-Kækjudalsá	ISKK.	Zircon	ISKK_26.1	Jan.2013.	TLC2.	Jan.2013.	MAD Zircon	0.01	48.1	0.09	24.86	2.94	7.42	179.19	0.57	3.01	4.01	5.42	0.47	2129.68	10.53	0.02	15.13	2.66	7.21	2.58	68.18	23.44	260.32	97.57	398.8	75.29	562.17	89.54	10615.1	54.42	110.59
Carley et al. 2014.	Krossá-Kækjudalsá	ISKK.	Zircon	ISKK_3.1	Jan.2013.	TLC2.	Jan.2013.	MAD Zircon	0	44.98	0.06	21.86	1.6	4.97	232.65	0.38	2.11	21.88	7.21	6.06	2002.45	10.23	0.02	12.23	2.5	6.25	1.66	56.5	19.63	223.92	86.2	350.92	69.05	531.85	89.5	10808.3	61.12	120.91
Carley et al. 2014.	Krossá-Kækjudalsá	ISKK.	Zircon	ISKK_54.1	Jan.2013.	TLC2.	Jan.2013.	MAD Zircon	0.01	0.09	0.04	31.81	2.05	7.66	321.61	0.44	2.01	6.66	6.41	1.04	2992.84	68.48	0.06	51.2	3.09	8.84	2.57	90.74	31.95	355.67	133.32	552.48	104.19	779.4	128.06	10865.7	174.46	287.02
Carley et al. 2014.	Krossá-Kækjudalsá	ISKK.	Zircon	ISKK_56.1	Jan.2013.	TLC2.	Jan.2013.	MAD Zircon	0.01	0.79	0.04	44.36	1.22	4.11	526.92	0.33	1.66	11.19	13.37	0.58	6592.59	131.31	0.11	122.31	9.55	26.13	8.58	243.43	77.34	801.79	286.65	1104.12	207.87	1514.18	243.03	9353.85	418.14	564.94
Carley et al. 2014.	Krossá-Kækjudalsá	ISKK.	Zircon	ISKK_61.1	Jan.2013.	TLC2.	Jan.2013.	MAD Zircon	0	0.13	0.03	21.45	1.38	3.43	179.27	0.32	1.66	5.43	5.47	0.26	1793.68	24.1	0.02	24.63	1.67	5.01	1.55	48.9	17.87	194.47	77.28	315.11	61.09	460.47	76.76	11096.9	67.31	145.79
Carley et al. 2014.	Krossá-Kækjudalsá	ISKK.	Zircon	ISKK_64.1	Jan.2013.	TLC2.	Jan.2013.	MAD Zircon	0.12	6.98	0.15	11.08	2.65	6.86	224.62	0.53	2.7	20.18	7.1	0.41	1136.07	16.21	0	14.52	0.95	2.98	0.76	28.45	10.53	125.57	48.29	213.57	42.81	346.88	58.58	11069.2	40.29	102.52
Carley et al. 2014.	Krossá-Kækjudalsá	ISKK.	Zircon	ISKK_67.1	Jan.2013.	TLC2.	Jan.2013.	MAD Zircon	0.06	0.17	0.11	34.35	32.58	75.93	176.02	32.36	10.12	3.97	6.5	14.75	2430.5	31.94	0.58	16.7	3.09	8.22	2.57	73.49	25.19	286.85	107.66	444.1	86.45	634.77	108.1	11138.9	60.45	120.75
Carley et al. 2014.	Krossá-Kækjudalsá	ISKK.	Zircon	ISKK_69.1	Jan.2013.	TLC2.	Jan.2013.	MAD Zircon	0.91	2.04	0.06	135.13	32.96	17.95	1868.35	9.92	3.47	40.97	12	7	10582.9	538.91	0.21	688.4	10.23	32.49	9.16	342.49	120.29	1275.44	472.88	1875.22	351.11	2631.23	415.95	13552.4	1916.57	1273.34
Carley et al. 2014.	Krossá-Kækjudalsá	ISKK.	Zircon	ISKK_70.1	Jan.2013.	TLC2.	Jan.2013.	MAD Zircon	0.01	2.32	0.09	69.86	2.94	7.29	562.74	0.49	2.84	7.5	5.2	2.1	7106.21	69.74	0.11	100.14	10.08	26.84	7.44	250.2	84.95	922.37	325.18	1322.86	255.62	1895.59	294.38	10051.9	306.83	423.09
Carley et al. 2014.	Krossá-Kækjudalsá	ISKK.	Zircon	ISKK_75.1	Jan.2013.	TLC2.	Jan.2013.	MAD Zircon	0	0.21	0.07	25.28	3.27	7.42	362.86	2.45	2.4	3.3	8.59	1.78	2698.81	78.29	0.04	52.48	2.94	7.98	2.69	82.6	29.42	322.96	122.96	492.49	94.23	700.46	110.45	10792.3	189.45	244.27
Carley et al. 2014.	Krossá-Kækjudalsá	ISKK.	Zircon	ISKK_76.1	Jan.2013.	TLC2.	Jan.2013.	MAD Zircon	0.01	0.01	0.1	51.04	23.52	18.55	234.47	10.07	20.95	23.27	11.51	15.37	1376.68	17.94	0.08	13.43	1.4	4.09	1.24	38.32	13.28	141.38	60.43	246.58	48.85	381.25	65.42	9438.28	62.07	121.92
Carley et al. 2014.	Krossá-Kækjudalsá	ISKK.	Zircon	ISKK_8.1	Jan.2013.	TLC2.	Jan.2013.	MAD Zircon	0.01	0.55	0.03	63.44	1.62	5.24	376.41	0.37	1.95	6.12	5.32	0.83	5232.36	55.27	0.09	47.81	6.26	15.73	4.44	162.54	56.3	607.53	234.49	925.5	173.41	1265.5	202.21	10514.1	197.96	327.62
Carley et al. 2014.	Krossá-Kækjudalsá	ISKK.	Zircon	ISKK_9.1	Jan.2013.	TLC2.	Jan.2013.	MAD Zircon	0.01	0.02	0.06	9.02	3.07	12.75	314.37	0.71	3.85	32.84	12.73	5.26	882.04	5.38	0.48	5.54	0.65	1.81	0.45	20.39	7.74	88.92	37.31	165.75	34.32	291.02	53.43	9115.14	22.95	47.6
Carley et al. 2014.	Krossá-Kækjudalsá	ISKK.	Zircon	ISKK-15.1	Jan.2013.	TLC6.	Jan.2013.	MAD Zircon	0	63.71	0.14	10.49	7.68	15.01	296.41	1.12	5.93	43.44	24.14	0.8	1658.2	6.77	0.06	5.47	2.48	5.6	1.8	51.61	16.84	181.34	71.2	294.74	59.86	477.77	82	9072.59	28.34	64.58
Carley et al. 2014.	Krossá-Kækjudalsá	ISKK.	Zircon	ISKK-16.1	Jan.2013.	TLC6.	Jan.2013.	MAD Zircon	0.02	0.95	0.08	11.81	10.21	12.19	751.68	1.36	7.82	40.88	29.43	7.55	6591.35	142.65	0.08	112.25	10.78	31.26	11.85	260.89	84.98	832.44	298.19	1112.41	202.12	1478.23	234.76	7981.23	1147.07	776.72
Carley et al. 2014.	Krossá-Kækjudalsá	ISKK.	Zircon	ISKK-17.1	Jan.2013.	TLC6.	Jan.2013.	MAD Zircon	0	4.3	0.06	8.9	6.47	12.1	254.49	0.96	8.27	21.63	8.35	6.98	1120.97	15.84	0.18	14.46	1.04	2.71	0.8	27.35	10.3	119.48	47.45	204.12	42.38	339.67	59.5	10879.5	45.08	102.82
Carley et al. 2014.	Krossá-Kækjudalsá	ISKK.	Zircon	ISKK-20.1	Jan.2013.	TLC6.	Jan.2013.	MAD Zircon	0.27	0.82	0.11	37.43	7.88	12.72	779.66	1.32	6.99	23.25	25.73	1.26	8502.78	275.75	0.12	189.79	17.02	46.41	15.71	371.56	111.47	1103.04	383.18	1420.24	254.54	1850.06	283.8	8489.5	1335.7	951
Carley et al. 2014.	Krossá-Kækjudalsá	ISKK.	Zircon	ISS_10.1	Jan.2013.	TLC2.	Jan.2013.	MAD Zircon	0.01	103.77	0.04	17.53	1.86	4.79	234.32	0.38	2.32	6.19	5.87	0.36	1844.79	41.91	0.03	31.3	1.86	5.2	1.53	49.6	17.4	198.71	78.19	321.05	61.41	475.12	78.21	10774.5	70.13	157.88
Carley et al. 2014.	Storaá	ISS.	Zircon	ISS_11.1	Jan.2013.	TLC2.	Jan.2013.	MAD Zircon	0.15	145.36	1	117.73	5.19	41.48	2087.16	16.33	44.03	129.28	21.16	4450.47	7383.28	128.79	1.98	86.04	22.04	46.04	1.31	301.52	107.91	1078.31	380.92	1422.82	278.2	1985.96	289.65	11740.6	1858.74	5510.25
Carley et al. 2014.	Storaá	ISS.	Zircon	ISS_12.1	Jan.2013.	TLC2.	Jan.2013.	MAD Zircon	0	43.16	0.22	12.73	2.42	5.42	199.84	0.44	2.68	4.22	5.72	0.37	1341.27	28.16	0.01	20.64	1.35	3.77	1.22	35.85	13.39	154.61	60.45	247.5	49.1	378.65	63.2	11135.6	54.99	127.01
Carley et al. 2014.	Storaá	ISS.	Zircon	ISS_13.1	Jan.2013.	TLC2.	Jan.2013.	MAD Zircon	0.01	264.37	0.62	58.41	2.03	5.1	343.7	0.39	2.35	5.17	5.32	0.29	4978.13	36.6	0.06	36.65	5.97	14.95	4.03	153.31	52.97	584.7	217.12	875.7	161.7	1194.94	191.73	10656.7	163.12	290.28
Carley et al. 2014.	Storaá	ISS.	Zircon	ISS_14.1	Jan.2013.	TLC2.	Jan.2013.	MAD Zircon	0.01	2.38	0.13	18.96	1.95	5.61	158.82	1.13	2.52	4.98	5.74	1.91	1416.77	25.48	0.19	20.68	1.42	3.89	1.23	38.42	14.15	160.96	62.27	255.68	50.03	378.19	63.65	10841	40.2	104.13
Carley et al. 2014.	Storaá	ISS.	Zircon	ISS_15.1	Jan.2013.	TLC2.	Jan.2013.	MAD Zircon	0.02	807.01	2.36	63.34	1.92	5.45	669.56	0.42	2.42	11.52	12.72	0.34	9251.83	127.41	0.22	126.87	17.65	45.34	17.21	388.79	118.28	1189.37	427.04	1610.29	293.63	2125.05	334.52	9087.44	627.4	628.33
Carley et al. 2014.	Storaá	ISS.	Zircon	ISS_16.1	Jan.2013.	TLC2.	Jan.2013.	MAD Zircon	0.02	403.03	0.98	53.33	2.11	6.09	271.5	0.42	2.4	3.8	6.82	0.31	6391.59	123.06	0.26	127.94	11.68	24.33	3.47	193.19	66.84	709.55	255.44	1029.24	199.56	1485.23	218.82	9412.23	289.08	420.19
Carley et al. 2014.	Storaá	ISS.	Zircon	ISS_18.1	Jan.2013.	TLC2.	Jan.2013.	MAD Zircon	0.01	3.44	0.07	11.5	2.61	6.71	214.11	0.43	2.58	5.01	5.93	0.35	1505.01	30.68	0.01	23.74	1.45	4.31	1.28	41.51	15.28	172.96	66.8	282.04	55.2	416.62	69.26	11010.7	72.07	149.08
Carley et al. 2014.	Storaá	ISS.	Zircon	ISS_19.1	Jan.2013.	TLC2.	Jan.2013.	MAD Zircon	0	27.61	0.08	12.59	1.84	5.06	213.34	0.45	2.41	6.5	7.38	0.37	1404.85	24.32	0.01	18.46	1.54	3.85	1.38	39.91	13.79	158.9	62.32	255.44	50.89	397.79	66.86	10136.8	45.87	107.46
Carley et al. 2014.	Storaá	ISS.	Zircon	ISS_2.1	Jan.2013.	TLC2.	Jan.2013.	MAD Zircon	0.01	5.25	0.11	14.69	2.94	7.01	206.31	0.54	3.21	4.4	5.61	0.57	1358.48	30.52	0.02	21.15	1.42	3.96	1.19	37.72	13.72	157.09	58.81	258.21	50.21	385.83	63.77	10872.3	62.44	137.68
Carley et al. 2014.	Storaá	ISS.	Zircon	ISS_20.1	Jan.2013.	TLC2.	Jan.2013.	MAD Zircon	0.01	131.91	0.6	16.42	1.94	15.99	364.49	0.36	2.38	25.95	16.36	5.57	6459.97	27.63	0.14	24.8	15.43	34.54	14.26	274.45	82.81	837.5	294.26	1168.37	220.92	1651.47	275.57	8225.89	168.02	238.07
Carley et al. 2014.	Storaá	ISS.	Zircon	ISS_21.1	Jan.2013.	TLC2.	Jan.2013.	MAD Zircon	0.01	289.98	7.69	136.93	5.91	28.2	722.56	0.51	4.59	20.56	36.55	92.36	10058.3	95.06	0.32	110.04	23.76	53.87	18.85	438.46	132.09	1301.81	462.3	1720.26	314.35	2269.13	359.09	8669.51	643.42	559.4
Carley et al. 2014.	Storaá	ISS.	Zircon	ISS_23.1	Jan.2013.	TLC2.	Jan.2013.	MAD Zircon	0.07	218.48	0.39	150.87	7.46	9.9	483.92	4.31	8.16	11.99	15.16	8.22	4467.56	103.96	0.78	81.26	6.09	17.94	6.66	164.89	55.61	564.71	204.28	794.89	147.6	1077.59	173.06	9570.63	607.59	599.18
Carley et al. 2014.	Storaá	ISS.	Zircon	ISS_26.1	Jan.2013.	TLC2.	Jan.2013.	MAD Zircon	0.01	22.61	0.27	21.03	2.03	4.83	244.78	1.08	2.37	5.75	5.78	0.6	1850.55	44.91	0.15	35.62	1.84	5.35	1.64	50.78	19.22	211.16	83.17	348.25	66.57	518.43	84.47	11070.8	97.01	185.38
Carley et al. 2014.	Storaá	ISS.	Zircon	ISS_27.1	Jan.2013.	TLC2.	Jan.2013.	MAD Zircon	0.01	44.22	0.09	17.97	1.91	4.18	232.64	0.36	2.03	5.24	6.13	0.34	1660.22	35.96	0.02	26.73	1.61	4.44	1.45	48.2	16.43	189.49	72.21	302.29	57.71	443.05	72.9	10771.9	99.91	183.86
Carley et al. 2014.	Storaá	ISS.	Zircon	ISS_28.1	Jan.2013.	TLC2.	Jan.2013.	MAD Zircon	0	0.37	0.07	27.5	2.04	6.1	450	0.38	2.3	3.37	9.33	0.4	3068.73	93.8	0.02	60.36	3.42	9.58	3.2	97.48	33.35	372	142.74	563.2	103.79	756.19	121.79	10835.4	263.88	333.96
Carley et al. 2014.	Storaá	ISS.	Zircon	ISS_29.1	Jan.2013.	TLC2.	Jan.2013.	MAD Zircon	0.01	28.73	0.12	24.82	2.92	5.44	147.72	0.43	2.28	4.67	4.77	0.3	1885.43	14.94	0.02	18.21	1.63	5.63	1.75	58.44	19.82	217.12	85.7	345.96	67.42	501.73	83.83	11111	46.4	108.46
Carley et al. 2014.	Storaá	ISS.	Zircon	ISS_3.1	Jan.2013.	TLC2.	Jan.2013.	MAD Zircon	0.01	186.71	0.37	37.01	3.16	8.06	469.82	0.68	3.37	14.16	4.25	3.77	5225.68	123.75	0.08	99.8	7.5	22.78	8.18	205.97	66.58	683.05	239.44	910.37	166.62	1214.01	188.37	9842.83	656.97	585.45
Carley et al. 2014.	Storaá	ISS.	Zircon	ISS_30.1	Jan.2013.	TLC2.	Jan.2013.	MAD Zircon	0.01	199.89	0.6	16.16	2.69	6.21	412.46	0.51	2.83	19.68	12.66	1.21	4147.62	74.63	0.06	61.03	5.23	14.17	5.16	150.03	49.8	524.15	191.34	749.66	142.12	1054.5	171.7	9356.49	299.13	392.96
Carley et al. 2014.	Storaá	ISS.	Zircon	ISS_31.1	Jan.2013.	TLC2.	Jan.2013.	MAD Zircon	0.01	3.95	0.1	17.8	2.27	7.12	261.87	0.43	2.25	6.08	7.75	0.63	2331.54	61.06	0.03	52.06	2.68	8.26	2.63	81.68	26.04	272.86	104.2	395.44	75.19	541.71	86.86	10806.2	286.7	281.86
Carley et al. 2014.	Storaá	ISS.	Zircon	ISS_32.1	Jan.2013.	TLC2.	Jan.2013.	MAD Zircon	0.12	844.7	1.16	80.76	2.33	8.15	881.16	0.43	2.7	8.47	6.84	2.42	12601.3	114.12	0.37	129.1	30.21	65.08	25.61	493.99	146.74	1457.58	526.07	1902.87	339.17	2399.91	379.52	9575.84	333.89	407.43
Carley et al. 2014.	Storaá	ISS.	Zircon	ISS_34.1	Jan.2013.	TLC2.	Jan.2013.	MAD Zircon	0.56	273.63	0.64	16.83	2.43	6.52	411.77	0.43	2.5	18.76	11.69	0.37	3986.14	78.92	0.03	66.26	5.02	14.65	5.45	153.43	46.43	475.67	180.64	679.01	126.03	910.35	149.25	9321.27	486.59	485.21
Carley et al. 2014.	Storaá	ISS.	Zircon	ISS_37.1	Jan.2013.	TLC2.	Jan.2013.	MAD Zircon	0.02	337.53	0.38	48.09	2.62	7.62	525.1	0.58	2.94	11.07	8.6	3.31	6438.03	110.13	0.1	100.54	9.04	25.71	9.69	246.88	81.67	820.14	288.95	1115.47	208.43	1511.58	241.24	8982.96	362.86	461.27
Carley et al. 2014.	Storaá	ISS.	Zircon	ISS_38.1	Jan.2013.	TLC2.	Jan.2013.	MAD Zircon	0.01	215.64	0.36	34.4	1.65	7.55	473.94	0.4	2.82	20.75	14.04	0.57	7769.86	41.66	0.23	57.11	18.86	41.63	15.14	311.11	103.53	1018.93	360.91	1375.47	252.48	1822.87	283.77	8573.19	262.47	317.12
Carley et al. 2014.	Storaá	ISS.	Zircon	ISS_39.1	Jan.2013.	TLC2.	Jan.2013.	MAD Zircon	0.01	45.43	0.2	17.51	1.87	5.3	260.66	0.45	2.25	5.78	5.7	0.32	1907.88	44.99	0.02	33.84	2.04	5.39	1.64	53.71	19.63	221.8	83.45	350.05	67.98	512.34	84.25	10917.7	85.72	174.75
Carley et al. 2014.	Storaá	ISS.	Zircon	ISS_41.1	Jan.2013.	TLC2.	Jan.2013.	MAD Zircon	0	15.45	0.11	11.01	1.86	4.82	207.72	0.47	2.17	4.44	5.92	0.33	1333.19	27.18	0.02	20.75	1.29	3.75	1.22	36.85	13.04	152.64	58.88	241.9	48.11	369.4	60.59	10775	57.54	128.38
Carley et al. 2014.	Storaá	ISS.	Zircon	ISS_47.1	Jan.2013.	TLC2.	Jan.2013.	MAD Zircon	0.01	0.11	0.07	24.49	4.87	6.78	238.74	0.48	3.41	5.98	7.69	8.15	2139.77	38.85	0.38	31.95	2.85	6.53	1.97	62.55	20.63	241.64	95.3	381.35	73.04	557.53	90.85	10696	77.36	157.42
Carley et al. 2014.	Storaá	ISS.	Zircon	ISS_48.1	Jan.2013.	TLC2.	Jan.2013.	MAD Zircon	0.01	156.43	0.19	36.79	2.05	5.21	445.35	0.67	1275.61	6	5.72	20.54	3530.28	59.82	193.6	356.52	135.15	46.01	6.79	150.4	38.95	408.27	153.47	596.51	110.77	807.89	129.04	10798.5	142.13	233.8
Carley et al. 2014.	Storaá	ISS.	Zircon	ISS_5.1	Jan.2013.	TLC2.	Jan.2013.	MAD Zircon	0	42.38	0.13	6.73	1.86	5.69	427.01	0.38	2.51	44.1	9.76	1.25	2916.85	36.64	0.06	33.64	3.63	8.91	3.3	86.85	31.59	346.48	129.08	514.61	99.64	756.47	124.54	8395.19	158.43	193.42
Carley et al. 2014.	Storaá	ISS.	Zircon	ISS_7.1	Jan.2013.	TLC2.	Jan.2013.	MAD Zircon	0.01	202.27	2.06	32.21	2.18	11.39	1098.94	0.43	2.47	64.78	24.06	449.55	6110.96	54.9	0.17	92.08	9.3	21.77	5.74	205.51	71.63	772.73	277.96	1119.02	216.76	1607.03	264.92	10356	417.68	406.97
Carley et al. 2014.	Storaá	ISS.	Zircon	ISS_8.1	Jan.2013.	TLC2.	Jan.2013.	MAD Zircon	0.01	19.26	0.04	30.26	2.09	8.68	503.93	0.41	2.63	10.83	13.67	21.16	5044.29	118.54	0.08	92.51	6.86	19.6	7.91	192.63	62.16	647.3	230.49	879.05	162.98	1176.96	191.18	9640.48	585.4	585.25
Carley et al. 2014.	Storaá	ISS.	Zircon	ISS_9.1	Jan.2013.	TLC2.	Jan.2013.	MAD Zircon	0	0.04	0.08	10.71	2.99	6.16	238.72	0.55	2.97	29.39	17.16	8.78	718	4.98	0.01	5.38	0.68	2.11	0.81	19.61	6.87	78.86	30.22	130.87	26.76	213.28	37.76	8912.51	13.01	32.41
Carley et al. 2014.	Hvitserkur	IEHV	Zircon	IEHV-1.1	Jan. 2013.	TLC6.	Jan. 2013.	MAD Zircon	0.0322403	22.068	0.356687	56.1711	16.7695	108.778	241.589	55.135	23.9043	6.25942	898.245	38.2378	1702.25	137.207	1.10061	24.5912	2.78579	5.57475	2.37432	50.9893	18.593	210.261	79.8335	314.755	61.0111	462.62	74.4657	10866.5	64.1129	145.682
Carley et al. 2014.	Hvitserkur	IEHV	Zircon	IEHV-2	Jan. 2013.	TLC6.	Jan. 2013.	MAD Zircon	0.000607043	30.3191	0.478989	32.1849	817.015	749.572	147.978	1247.72	50.234	3.65883	6.60536	16.2796	1050.27	22.1226	1.47091	17.0783	1.56324	3.11587	1.03533	29.2833	9.99168	112.29	45.4665	193.926	38.0493	294.713	50.5255	11402.1	29.6812	80.0952
Carley et al. 2014.	Hvitserkur	IEHV	Zircon	IEHV-2.2	Jan. 2013.	TLC6.	Jan. 2013.	MAD Zircon	0.00857867	191.933	1.73883	54.3482	16.1496	20.3877	293.389	2.2516	15.7847	4.93278	5.122	4.81159	3425.58	53.522	0.109463	39.6857	4.09688	11.0312	3.19324	102.697	34.3448	382.191	151.695	597.451	112.593	832.158	132.742	10986.6	110.783	198.405
Carley et al. 2014.	Hvitserkur	IEHV	Zircon	IEHV-3.1	Jan. 2013.	TLC6.	Jan. 2013.	MAD Zircon	0.00602009	37.876	0.14817	59.2085	11.1881	16.0749	390.511	5.28074	9.26358	22.7254	7.47915	1.32656	5055.49	30.9951	0.0965124	32.6238	7.41186	18.2496	4.75772	173.294	54.9713	572.331	220.244	845.902	158.429	1197.83	190.194	10021.4	181.01	282.163

## Sheet: Standards Jan 2013
zz		Li7	Be9	B11	F19	Na23	Al27	Si30	P31	K39	Ca40	Sc45	Ti48	Ti49	Fe56	Y89	Nb93	Zr94H	Zr96	La139	Ce140	Nd146	Sm147	Eu153	Gd155	Ho165	TbO175	DyO179	ErO182	TmO185	YbO188	LuO191	Zr2O	HfO196	Pb206	207/206	ThO248	UO254	zz
																																										206/238	7/6 Age	Meas.	U ppm	Li	Be	B	F
																																										Age		7/6 Age		ppm	ppm	ppm	ppm
																																														Est.

MAD-11.2		0.0228553			9.82957e-05	0.00215139	0.0081603	0.476167	0.000805527	0.000327652	0.00151048	0.00610194		0.000318525	0.000592114	0.184553	0.00201307	0.000824982	854564	2.10634e-06	0.00870771	7.09133e-05	0.000143114	3.65098e-05	0.000265281	0.00256563	0.000720445	0.00166869	0.00323479	0.00187873	0.00301362	0.00303975	0.0109225	0.142319	0.00732326	0.0581637	0.0603718	0.221591	MAD-11.2	6:37:28 PM 24/ 1/2013		557.522				14.1069			23.916
MAD-13.2		0.0279043	0.000286801	0.000117069	0.000151199	0.00295884	0.00893155	0.480862	0.0008154	0.000289553	0.00195509	0.00632971	0.00429078	0.000319169	0.00057195	0.182174	0.00247397	0.000703515	908296	2.53221e-06	0.00935091	7.95996e-05	0.00015997	4.43688e-05	0.000268745	0.00264763	0.000713974	0.00170631	0.00317536	0.00187659	0.00299297	0.00295296	0.0112439	0.139483	0.00721703	0.0610965	0.0634165	0.221402	MAD-13.2	7:40:01 PM 24/ 1/2013		549.904				17.2232	1.42259	2.09231	36.7878
MAD-14.2		0.0298014	0.000356408	0.000124903	0.000143736	0.002099	0.00694036	0.468729	0.000771003	0.000239856	0.00143551	0.00595162	0.00383769	0.000320341	0.000555399	0.181818	0.00235528	0.000741954	938064	2.13205e-06	0.00879258	7.73934e-05	0.000152975	4.38136e-05	0.000267892	0.00254087	0.000708552	0.00168023	0.00316183	0.00190214	0.00291807	0.0030817	0.0108175	0.13968	0.00703364	0.0563049	0.0613559	0.219176	MAD-14.2	7:30:26 PM 24/ 1/2013		541.373				18.3942	1.76786	2.23231	34.9719
MAD-10.1		0.0189889	0.000266716	0.000109627	0.000133616	0.00560645	0.00998018	0.476647	0.00082375	0.000517697	0.00331976	0.00651223	0.00455016	0.000319595	0.000627582	0.184442	0.00243898	0.000910033	646130	1.85721e-06	0.00884651	7.7229e-05	0.000165137	4.24063e-05	0.000276879	0.00265168	0.000765841	0.00175326	0.00337496	0.00194723	0.00305073	0.00321168	0.0104627	0.146738	0.0078221	0.0587642	0.0664531	0.226067	MAD-10.1	5:44:02 PM 23/ 1/2013		583.709	558.37			11.7205	1.32297	1.9593	32.5097
MAD-11.1		0.0226455	0.000276589	0.00011197	0.000128884	0.00128718	0.00620574	0.467079	0.000735069	0.000260866	0.0011744	0.00624755	0.00458023	0.000331621	0.000628936	0.185533	0.00252318	0.00108134	699594	2.8588e-06	0.00891231	8.03323e-05	0.000150516	4.41685e-05	0.000277304	0.00256029	0.000737809	0.0017472	0.00323855	0.00190611	0.00306463	0.00308036	0.0110957	0.144791	0.0071693	0.0637013	0.0620783	0.227164	MAD-11.1	5:56:18 PM 23/ 1/2013		532.411	731.726			13.9774	1.37194	2.00117	31.3585
MAD-7.1		0.0335168	0.000363861	8.88993e-05	9.11531e-05	0.00154459	0.00588388	0.495075	0.00076084	0.000193074	0.00119391	0.00582416	0.00443034	0.000315079	0.00131095	0.2044	0.00280611	0.00117648	665547	2.40404e-06	0.00904204	8.35403e-05	0.00016047	4.95833e-05	0.000281873	0.00287583	0.000725468	0.00178375	0.00345881	0.00201714	0.00322842	0.00335463	0.0124289	0.143651	0.00763447	0.0597312	0.0571728	0.242708	MAD-7.1	5:09:01 PM 23/ 1/2013		530.646	593.85			20.6874	1.80482	1.58885	22.1782
MAD-8.1		0.0236281	0.000276865	0.000126272	0.000237067	0.00305633	0.0108663	0.477435	0.000797431	0.000411245	0.00218623	0.00689793	0.00449996	0.000320889	0.000618341	0.179891	0.00231977	0.000874816	678428	1.62139e-06	0.00920937	8.21015e-05	0.000159486	4.43672e-05	0.000284628	0.0025564	0.00072496	0.00172728	0.00312855	0.00187025	0.00289468	0.00302316	0.0106094	0.139767	0.00685319	0.0608681	0.065833	0.20675	MAD-8.1	5:23:20 PM 23/ 1/2013		559.187	634.575			14.5839	1.37331	2.25679	57.6802
MAD-9.1		0.0246626	0.000376156	0.000125716	0.000105631	0.00319422	0.00999329	0.466673	0.000810086	0.000424756	0.00203526	0.00512757	0.00429293	0.000295916	0.00146768	0.193471	0.00288432	0.000806366	672151	2.38042e-06		7.42393e-05	0.000152644	3.97232e-05	0.000280592	0.0026745	0.000726027	0.00168514	0.00332837	0.00205385	0.00322596	0.00330407	0.0104203	0.146406	0.00816364	0.0602311	0.0547823	0.241262	MAD-9.1	5:34:12 PM 23/ 1/2013		570.826	611.886			15.2224	1.86581	2.24685	25.7008
MAD-1.1		0.0218919	0.000263037	0.000115014	0.000150601	0.00245088	0.00694494	0.480136	0.000807484	0.000362062	0.0014696	0.00645445	0.0045886	0.000336996	0.000598021	0.179987	0.00227356	0.000951573	646298	2.32091e-06	0.00950444	7.16388e-05	0.000157203	4.37879e-05	0.000269535	0.002594	0.000743465	0.00172934	0.00318816	0.00191191	0.00307443	0.00313426	0.0112746	0.143709	0.00713587	0.058761	0.0649994	0.22798	MAD-1.1	9:22:38 AM 23/ 1/2013		528.033	558.254			13.5122	1.30471	2.05558	36.6424
MAD-2.1		0.02055	0.000245178	0.000104821	0.000142658	0.00204784	0.00689515	0.474958	0.000803028	0.000297588	0.00139468	0.00683686	0.00461998	0.0003433	0.000555294	0.18124	0.00231996	0.000903502	651908	1.68736e-06	0.00893854	8.06863e-05	0.000168582	4.15703e-05	0.000272891	0.00254228	0.000710735	0.00171906	0.00319013	0.00187629	0.00299122	0.00308224	0.0108808	0.140014	0.00702201	0.0608384	0.0634041	0.216526	MAD-2.1	9:34:24 AM 23/ 1/2013		547.092	633.526			12.684	1.21613	1.8734	34.7098
MAD-3.1		0.025543	0.000298994	0.000112251	0.000125865	0.00372202	0.00928116	0.476402	0.000827629	0.000462363	0.00219376	0.0061579	0.00445409	0.000319338	0.000610319	0.181231	0.002506	0.000863077	648842	1.84945e-06		7.7831e-05	0.000156587	4.09961e-05	0.000267554	0.00261081	0.000703305	0.00167478	0.00315357	0.00192702	0.0029807	0.00311427	0.0104224	0.143921	0.00743648	0.0532631	0.0600359	0.218688	MAD-3.1	9:45:41 AM 23/ 1/2013		573.657	340.023			15.7658	1.48307	2.00621	30.6239
MAD-4.1			0.000260747	0.00010294	0.000120706	0.00247292	0.00738661	0.46867	0.000799093	0.00031274	0.00167547	0.00588601	0.00441598	0.000308507	0.000611371	0.179156	0.00257857	0.000937435	637911	2.0379e-06	0.0089257	7.24239e-05	0.000140302	3.79363e-05	0.000261008	0.00272635	0.000701247	0.00171576	0.00329565	0.00198695	0.00302733	0.00312034	0.0106927	0.144814	0.00767207	0.0594593	0.0620742	0.230714	MAD-4.1	9:56:40 AM 23/ 1/2013		560.981	583.956				1.29336	1.83979	29.3688
MAD-5.1		0.021457	0.000329095	0.000107086	0.000132944	0.00330192	0.00898821	0.477501	0.00082881	0.000355736	0.00197802	0.00565847	0.00414095	0.00032549	0.00131716	0.195506	0.00266849	0.000814901	638114	2.03725e-06	0.00859031	8.61915e-05	0.000155772	3.9178e-05	0.000269701	0.00273123	0.00072218	0.00176301	0.00349755	0.00204718	0.00318047	0.0033633	0.0101706	0.145092	0.00796409	0.0581464	0.0568284	0.235478	MAD-5.1	10:07:10 AM 23/ 1/2013		570.552	535.283			13.2438	1.63238	1.9139	32.3462
MAD-6.1		0.0224849	0.000330845	0.000108186	0.000136477	0.00480707	0.00927308	0.483767	0.000831826	0.000470727	0.00235913	0.00559332	0.00408503	0.000308683	0.00115599	0.192212	0.00269548	0.000865225	636250	1.88605e-06		7.74852e-05	0.000159214	3.72495e-05	0.00027222	0.00267374	0.000751276	0.00173831	0.00331342	0.00200314	0.0031036	0.00331761	0.00985225	0.145743	0.00761555	0.0606761	0.0565277	0.227586	MAD-6.1	10:17:44 AM 23/ 1/2013		564.502	627.772			13.8782	1.64106	1.93355	33.2058
Aver.		0.0243023	0.000302407	0.000111904	0.000135631	0.00290719	0.00826648	0.476436	0.000801213	0.000351851	0.00184866	0.00611284	0.00436821	0.000320246	0.000801508	0.186115	0.00248977	0.000889657	708721	2.12224e-06	0.00898367	7.79718e-05	0.000155855	4.18328e-05	0.000272579	0.00263937	0.000725377	0.00172086	0.00326712	0.00194318	0.00305334	0.00315574	0.0108067	0.143295	0.00743305	0.0592861	0.0610953	0.225935	Aver.			555	577.618			15	1.5	2	33
Conc.		15	1.5	2	33	4	18		172	1	3	10.6	25.6	25.6	4.5	960	65	1	1	0.04	139	2.18	4.36	0.362	26	32	8.25	85	153	36	325	60		16280	325		1166	4196	Conc.
STD		0.00402704	4.3838e-05	1.04268e-05	3.45507e-05	0.00119819	0.00156348	0.00755204	2.79864e-05	9.51854e-05	0.000573037	0.000487695	0.000231992	1.19773e-05	0.000341974	0.00747162	0.000230702	0.000124168	106619	3.45435e-07	0.000275157	4.53193e-06	7.66883e-06	3.54363e-06	6.81302e-06	9.41058e-05	1.86505e-05	3.49784e-05	0.000115627	6.60648e-05	0.000103115	0.000131886	0.000615622	0.00259808	0.000390215	0.00246525	0.00366962	0.00973817								2.57214	0.222759	0.193518	8.74947
%		16.5706	14.4964	9.31758	25.474	41.2146	18.9135	1.58511	3.49301	27.0528	30.9974	7.97821	5.31092	3.74001	42.6663	4.01451	9.266	13.9568	15.0439	16.2769	3.06286	5.81227	4.92049	8.47095	2.49947	3.56546	2.57115	2.03261	3.53912	3.39983	3.37712	4.17925	5.69666	1.8131	5.24973	4.15822	6.0064	4.31016								18.5336	13.5741	10.0084	26.3493
MAD-1.1		0.0218919	0.000263037	0.000115014	0.000150601	0.00245088	0.00694494	0.480136	0.000807484	0.000362062	0.0014696	0.00645445	0.0045886	0.000336996	0.000598021	0.179987	0.00227356	0.000951573	646298	2.32091e-06	0.00950444	7.16388e-05	0.000157203	4.37879e-05	0.000269535	0.002594	0.000743465	0.00172934	0.00318816	0.00191191	0.00307443	0.00313426	0.0112746	0.143709	0.00713587	0.058761	0.0649994	0.22798	MAD-1.1	9:22:38 AM 23/ 1/2013		528.033	558.254			13.5122	1.30471	2.05558	36.6424
MAD-2.1		0.02055	0.000245178	0.000104821	0.000142658	0.00204784	0.00689515	0.474958	0.000803028	0.000297588	0.00139468	0.00683686	0.00461998	0.0003433	0.000555294	0.18124	0.00231996	0.000903502	651908	1.68736e-06	0.00893854	8.06863e-05	0.000168582	4.15703e-05	0.000272891	0.00254228	0.000710735	0.00171906	0.00319013	0.00187629	0.00299122	0.00308224	0.0108808	0.140014	0.00702201	0.0608384	0.0634041	0.216526	MAD-2.1	9:34:24 AM 23/ 1/2013		547.092	633.526			12.684	1.21613	1.8734	34.7098
MAD-3.1		0.025543	0.000298994	0.000112251	0.000125865	0.00372202	0.00928116	0.476402	0.000827629	0.000462363	0.00219376	0.0061579	0.00445409	0.000319338	0.000610319	0.181231	0.002506	0.000863077	648842	1.84945e-06	0.0079588	7.7831e-05	0.000156587	4.09961e-05	0.000267554	0.00261081	0.000703305	0.00167478	0.00315357	0.00192702	0.0029807	0.00311427	0.0104224	0.143921	0.00743648	0.0532631	0.0600359	0.218688	MAD-3.1	9:45:41 AM 23/ 1/2013		573.657	340.023			15.7658	1.48307	2.00621	30.6239
MAD-4.1		0.0154682	0.000260747	0.00010294	0.000120706	0.00247292	0.00738661	0.46867	0.000799093	0.00031274	0.00167547	0.00588601	0.00441598	0.000308507	0.000611371	0.179156	0.00257857	0.000937435	637911	2.0379e-06	0.0089257	7.24239e-05	0.000140302	3.79363e-05	0.000261008	0.00272635	0.000701247	0.00171576	0.00329565	0.00198695	0.00302733	0.00312034	0.0106927	0.144814	0.00767207	0.0594593	0.0620742	0.230714	MAD-4.1	9:56:40 AM 23/ 1/2013		560.981	583.956			9.54738	1.29336	1.83979	29.3688
MAD-5.1		0.021457	0.000329095	0.000107086	0.000132944	0.00330192	0.00898821	0.477501	0.00082881	0.000355736	0.00197802	0.00565847	0.00414095	0.00032549	0.00131716	0.195506	0.00266849	0.000814901	638114	2.03725e-06	0.00859031	8.61915e-05	0.000155772	3.9178e-05	0.000269701	0.00273123	0.00072218	0.00176301	0.00349755	0.00204718	0.00318047	0.0033633	0.0101706	0.145092	0.00796409	0.0581464	0.0568284	0.235478	MAD-5.1	10:07:10 AM 23/ 1/2013		570.552	535.283			13.2438	1.63238	1.9139	32.3462
MAD-6.1		0.0224849	0.000330845	0.000108186	0.000136477	0.00480707	0.00927308	0.483767	0.000831826	0.000470727	0.00235913	0.00559332	0.00408503	0.000308683	0.00115599	0.192212	0.00269548	0.000865225	636250	1.88605e-06	0.00794671	7.74852e-05	0.000159214	3.72495e-05	0.00027222	0.00267374	0.000751276	0.00173831	0.00331342	0.00200314	0.0031036	0.00331761	0.00985225	0.145743	0.00761555	0.0606761	0.0565277	0.227586	MAD-6.1	10:17:44 AM 23/ 1/2013		564.502	627.772			13.8782	1.64106	1.93355	33.2058
MAD-10.1		0.0189889	0.000266716	0.000109627	0.000133616	0.00560645	0.00998018	0.476647	0.00082375	0.000517697	0.00331976	0.00651223	0.00455016	0.000319595	0.000627582	0.184442	0.00243898	0.000910033	646130	1.85721e-06	0.00884651	7.7229e-05	0.000165137	4.24063e-05	0.000276879	0.00265168	0.000765841	0.00175326	0.00337496	0.00194723	0.00305073	0.00321168	0.0104627	0.146738	0.0078221	0.0587642	0.0664531	0.226067	MAD-10.1	5:44:02 PM 23/ 1/2013		583.709				11.7205	1.32297	1.9593	32.5097
MAD-11.1		0.0226455	0.000276589	0.00011197	0.000128884	0.00128718	0.00620574	0.467079	0.000735069	0.000260866	0.0011744	0.00624755	0.00458023	0.000331621	0.000628936	0.185533	0.00252318	0.00108134	699594	2.8588e-06	0.00891231	8.03323e-05	0.000150516	4.41685e-05	0.000277304	0.00256029	0.000737809	0.0017472	0.00323855	0.00190611	0.00306463	0.00308036	0.0110957	0.144791	0.0071693	0.0637013	0.0620783	0.227164	MAD-11.1	5:56:18 PM 23/ 1/2013		532.411				13.9774	1.37194	2.00117	31.3585
MAD-7.1		0.0335168	0.000363861	8.88993e-05	9.11531e-05	0.00154459	0.00588388	0.495075	0.00076084	0.000193074	0.00119391	0.00582416	0.00443034	0.000315079	0.00131095	0.2044	0.00280611	0.00117648	665547	2.40404e-06	0.00904204	8.35403e-05	0.00016047	4.95833e-05	0.000281873	0.00287583	0.000725468	0.00178375	0.00345881	0.00201714	0.00322842	0.00335463	0.0124289	0.143651	0.00763447	0.0597312	0.0571728	0.242708	MAD-7.1	5:09:01 PM 23/ 1/2013		530.646				20.6874	1.80482	1.58885	22.1782
MAD-8.1		0.0236281	0.000276865	0.000126272	0.000237067	0.00305633	0.0108663	0.477435	0.000797431	0.000411245	0.00218623	0.00689793	0.00449996	0.000320889	0.000618341	0.179891	0.00231977	0.000874816	678428	1.62139e-06	0.00920937	8.21015e-05	0.000159486	4.43672e-05	0.000284628	0.0025564	0.00072496	0.00172728	0.00312855	0.00187025	0.00289468	0.00302316	0.0106094	0.139767	0.00685319	0.0608681	0.065833	0.20675	MAD-8.1	5:23:20 PM 23/ 1/2013		559.187				14.5839	1.37331	2.25679	57.6802
MAD-9.1		0.0246626	0.000376156	0.000125716	0.000105631	0.00319422	0.00999329	0.466673	0.000810086	0.000424756	0.00203526	0.00512757	0.00429293	0.000295916	0.00146768	0.193471	0.00288432	0.000806366	672151	2.38042e-06	0.0080467	7.42393e-05	0.000152644	3.97232e-05	0.000280592	0.0026745	0.000726027	0.00168514	0.00332837	0.00205385	0.00322596	0.00330407	0.0104203	0.146406	0.00816364	0.0602311	0.0547823	0.241262	MAD-9.1	5:34:12 PM 23/ 1/2013		570.826				15.2224	1.86581	2.24685	25.7008
MAD-11.2		0.0228553	0.00015778	6.20199e-05	9.82957e-05	0.00215139	0.0081603	0.476167	0.000805527	0.000327652	0.00151048	0.00610194	0.00293495	0.000318525	0.000592114	0.184553	0.00201307	0.000824982	854564	2.10634e-06	0.00870771	7.09133e-05	0.000143114	3.65098e-05	0.000265281	0.00256563	0.000720445	0.00166869	0.00323479	0.00187873	0.00301362	0.00303975	0.0109225	0.142319	0.00732326	0.0581637	0.0603718	0.221591	MAD-11.2	6:37:28 PM 24/ 1/2013		557.522				14.1069	0.782622	1.10845	23.916
MAD-13.2		0.0279043	0.000286801	0.000117069	0.000151199	0.00295884	0.00893155	0.480862	0.0008154	0.000289553	0.00195509	0.00632971	0.00429078	0.000319169	0.00057195	0.182174	0.00247397	0.000703515	908296	2.53221e-06	0.00935091	7.95996e-05	0.00015997	4.43688e-05	0.000268745	0.00264763	0.000713974	0.00170631	0.00317536	0.00187659	0.00299297	0.00295296	0.0112439	0.139483	0.00721703	0.0610965	0.0634165	0.221402	MAD-13.2	7:40:01 PM 24/ 1/2013		549.904				17.2232	1.42259	2.09231	36.7878
MAD-14.2		0.0298014	0.000356408	0.000124903	0.000143736	0.002099	0.00694036	0.468729	0.000771003	0.000239856	0.00143551	0.00595162	0.00383769	0.000320341	0.000555399	0.181818	0.00235528	0.000741954	938064	2.13205e-06	0.00879258	7.73934e-05	0.000152975	4.38136e-05	0.000267892	0.00254087	0.000708552	0.00168023	0.00316183	0.00190214	0.00291807	0.0030817	0.0108175	0.13968	0.00703364	0.0563049	0.0613559	0.219176	MAD-14.2	7:30:26 PM 24/ 1/2013		541.373				18.3942	1.76786	2.23231	34.9719
MAD-13.1		0.000240582	3.88036e-06	2.71625e-06	8.73081e-05	0.00159308	0.00557899	0.34641	0.000593404	0.000236896	0.00133151	0.00599108	0.00412583	0.000315473	0.000542475	0.185066	0.00248991	0.000899856	859026	3.02668e-06	0.00915699	6.82168e-05	0.000144815	4.37705e-05	0.000231308	0.00240427	0.000674795	0.00159619	0.00290891	0.00170891	0.00254707	0.00278397	0.0103719	0.123864	0.00596163	0.0631688	0.0562954	0.182954	MAD-13.1	7:01:45 PM 24/ 1/2013		549.71				0.148494	0.0192474	0.0485461	21.2427
MAD-14.1		7.90521e-05	3.74654e-06	3.93387e-06	5.86334e-05	0.00196975	0.00676907	0.306569	0.000538659	0.000251768	0.0016574	0.00521182	0.00352048	0.000283801	0.00055861	0.180615	0.00206719	0.000758675	889709	2.36032e-06	0.00846434	7.54179e-05	0.000144991	3.97883e-05	0.000247047	0.00244574	0.000645529	0.00141226	0.00270913	0.00171742	0.00292998	0.00299592	0.00921453	0.135986	0.00738466	0.0573803	0.0604771	0.213646	MAD-14.1	7:17:18 PM 24/ 1/2013		583.103				0.048793	0.0185836	0.0703079	14.2659
MAD-12.1		0.0226827	8.23644e-05	4.61474e-05	0.000105146	0.00251124	0.00665107	0.465268	0.000789179	0.000250014	0.00186996	0.00545065	0.00408399	0.000308428	0.0014259	0.194101	0.00271651	0.00075822	855952	1.75243e-06	0.00880154	7.71071e-05	0.000111104	3.15438e-05	0.000201413	0.00048153	0.000400918	0.000943978	0.00196078	0.00124559	0.00204587	0.00211129	0.00503357	0.0903853	0.00472479	0.059097	0.0323882	0.135199	MAD-12.1	6:49:25 PM 24/ 1/2013		589.547				14.0004	0.408544	0.824767	25.5828
[truncated: 109 more columns]
